# Supplementary material for: Family-portraits for daphnids: scanning living individuals and populations to measure body length
Source: PubMed Central journal article supplement (PMC4515252; doi:10.1007/s10646-015-1490-0), 2015-06-06
Supplement: 10646_2015_1490_MOESM1_ESM.pdf [file 10646_2015_1490_MOESM1_ESM.pdf]

Family-portraits for *Daphnids* – Scanning living individuals and populations to measure body length

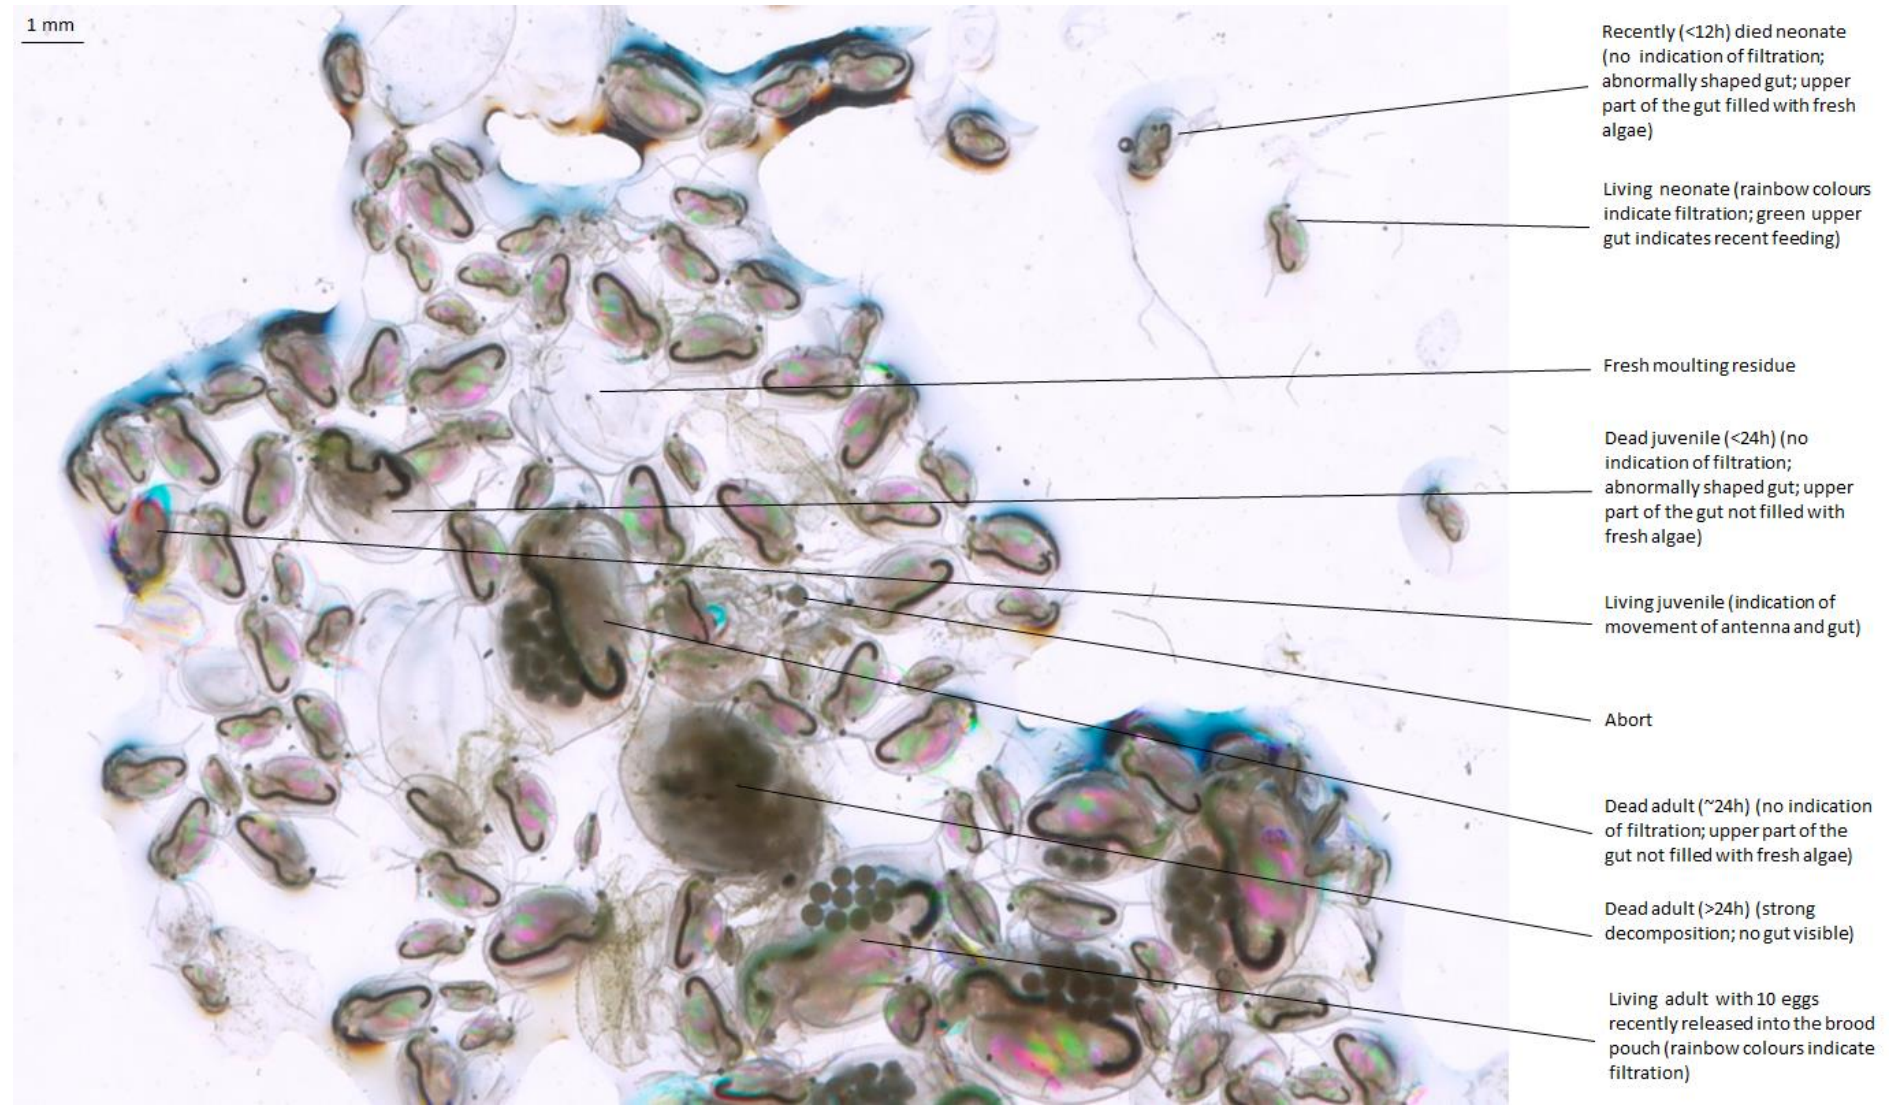

Figure 1: Illustration and explanation of a scanned population of *Daphnia magna* at a resolution of 1200 dots per inch.

Table 1: Comparison of body size measurements (mm) of Daphnids using microscopy and picture analysis.

|          | Microscopy | Picture analysis         |                          |                          |
|----------|------------|--------------------------|--------------------------|--------------------------|
|          |            | 720 dpi                  | 1200 dpi                 | 2400 dpi                 |
| Adult    | 2.80       | 2.75 (1.79) <sup>a</sup> | 2.79 (0.36) <sup>a</sup> | 2.77 (1.07) <sup>a</sup> |
| Juvenile | 2.16       | 2.13 (1.39) <sup>a</sup> | 2.11 (2.31) <sup>a</sup> | 2.09 (3.24) <sup>a</sup> |
| Neonate  | 1.33       | 1.45 (9.02) <sup>a</sup> | 1.31 (1.50) <sup>a</sup> | 1.26 (5.26) <sup>a</sup> |

<sup>a</sup> Relative difference to measurements via microscopy (%).

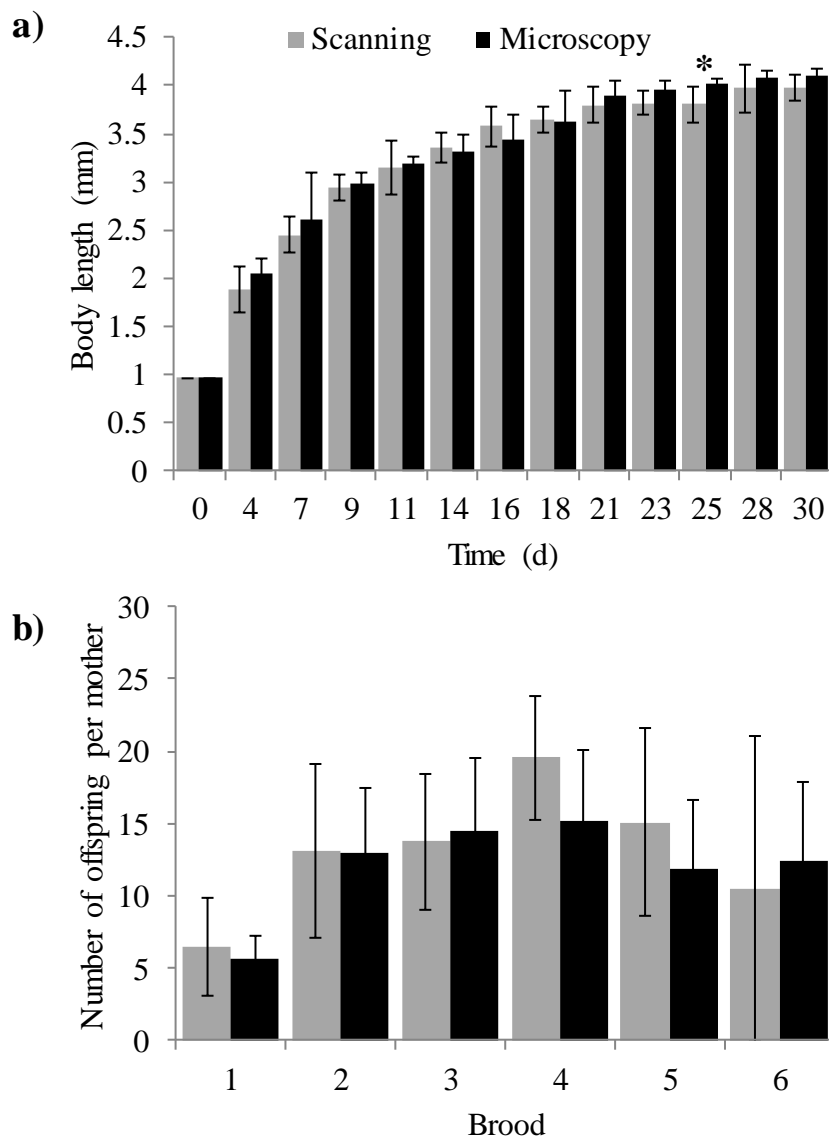

Figure 2: Comparison of growth (a) and reproduction (b) when using either microscopy or picture analysis for data acquisition. \* Significant difference at indicated day (Two-way ANOVA, Holm-Sidak method,  $p < 0.05$ ).

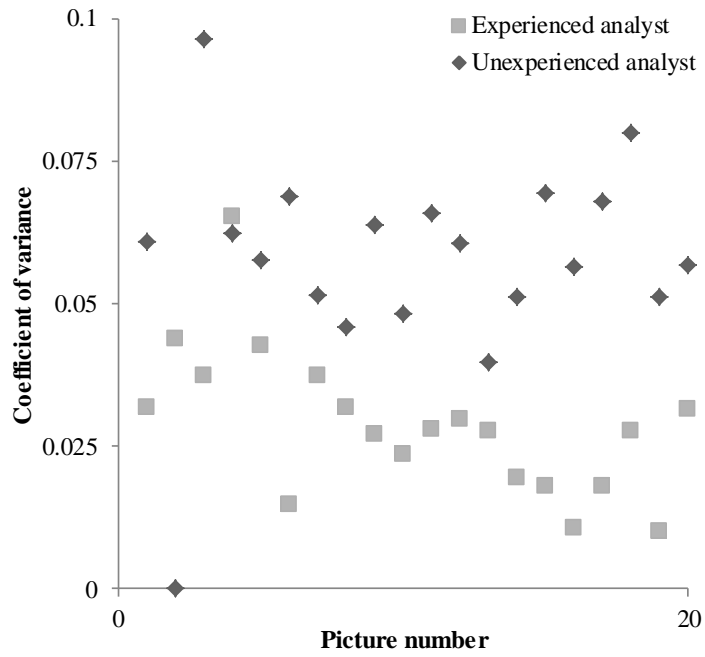

Figure 3: Coefficient of variance for 20 consecutively analysed pictures taken with the scanning method in dependence of the level of experience in picture analysis.

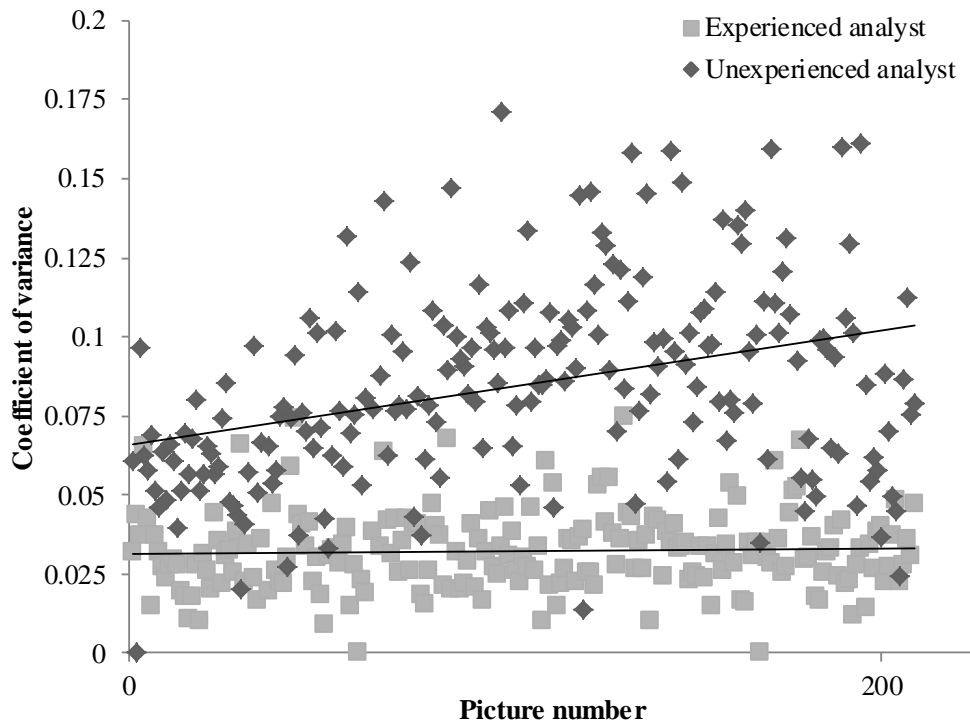

Figure 4: Coefficient of variance for > 200 consecutively analysed (within 10h) pictures taken with the scanning method in dependence of the level of experience in picture analysis.

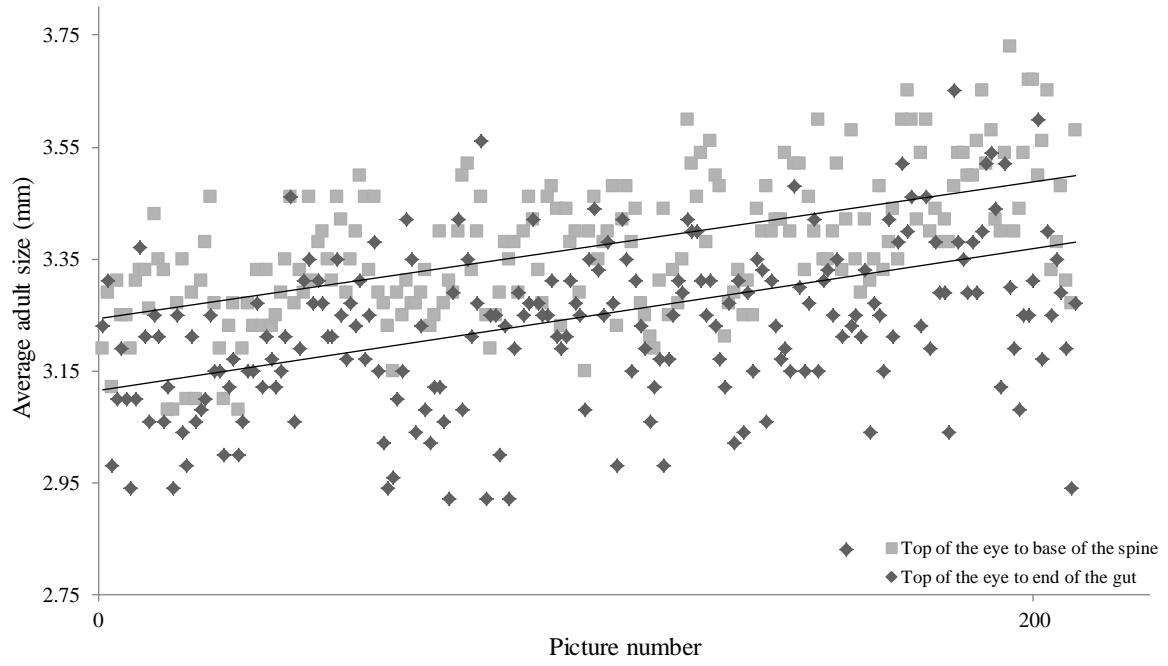

Figure 5: Measured adult size (mm) of *Daphnia magna* using two variations of the definition of body length.
